# Supplementary material for: Protective effect of cactus cladode extract against cisplatin induced oxidative stress, genotoxicity and apoptosis in balb/c mice: combination with phytochemical composition
Source: PubMed Central journal article supplement (PMC3567432; doi:10.1186/1472-6882-12-111), 2012-07-31
Supplement: 1472-6882-12-111-S1.pdf [file 1472-6882-12-111-S1.pdf]

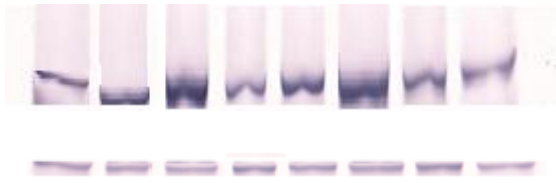

} p53 and Tubulin

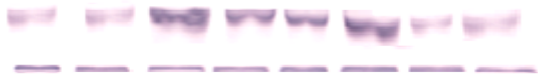

} Bax and Tubulin

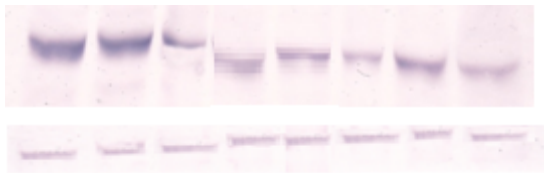

} Bcl2 and Tubulin

Figure 9
